# Supplementary material for: Association between Thyroid Function and Insulin Resistance Indices in Korean Adolescents: Findings from the 2014–2015 Korea National Health and Nutrition Examination Survey
Source: MDPI journal article supplement (doi:10.3390/children11030370), 2024-03-20
Supplement: s1 [file s1]

## Supplementary Materials

Supplemental Table S1. Association between basic characteristics and thyroid function.

|       |                                  | TSH (uIU/mL) |                 |                 |          | fT4 (ng/dL) |                 |                 |          |
|-------|----------------------------------|--------------|-----------------|-----------------|----------|-------------|-----------------|-----------------|----------|
|       |                                  | $\beta$      | lower<br>95% CI | upper<br>95% CI | <i>P</i> | $\beta$     | lower<br>95% CI | upper<br>95% CI | <i>P</i> |
| Boys  | Age (yrs)                        | -0.051       | -0.153          | 0.052           | 0.333    | 0.016       | 0.006           | 0.026           | 0.002    |
|       | Household<br>income<br>(ordinal) | 0.019        | -0.182          | 0.219           | 0.855    | -0.008      | -0.029          | 0.012           | 0.430    |
|       | Aerobic<br>exercise              | 0.230        | -0.110          | 0.571           | 0.184    | 0.000       | -0.055          | 0.055           | 0.997    |
|       | Muscle<br>exercise               | 0.077        | -0.299          | 0.453           | 0.687    | -0.032      | -0.073          | 0.008           | 0.115    |
|       | Parental<br>history of DM        | -0.272       | -0.847          | 0.303           | 0.353    | -0.017      | -0.123          | 0.089           | 0.754    |
|       | Waist<br>circumference<br>(cm)   | 0.002        | -0.013          | 0.018           | 0.779    | -0.001      | -0.003          | 0.001           | 0.201    |
|       | BMI (kg/m <sup>2</sup> )         | -0.003       | -0.045          | 0.039           | 0.875    | -0.004      | -0.008          | 0.001           | 0.131    |
|       |                                  |              |                 |                 |          |             |                 |                 |          |
| Girls | Age (yrs)                        | -0.072       | -0.170          | 0.025           | 0.143    | -0.001      | -0.011          | 0.010           | 0.901    |
|       | Household<br>income<br>(ordinal) | 0.011        | -0.167          | 0.189           | 0.902    | 0.008       | -0.009          | 0.025           | 0.372    |
|       | Aerobic<br>exercise              | -0.170       | -0.578          | 0.238           | 0.413    | -0.009      | -0.053          | 0.036           | 0.709    |
|       | Muscle<br>exercise               | -0.417       | -0.860          | 0.026           | 0.065    | -0.028      | -0.084          | 0.029           | 0.335    |
|       | Parental<br>history of DM        | -0.061       | -0.941          | 0.820           | 0.892    | -0.010      | -0.158          | 0.139           | 0.896    |
|       | Waist<br>circumference<br>(cm)   | -0.008       | -0.030          | 0.015           | 0.506    | -0.001      | -0.003          | 0.001           | 0.286    |
|       | BMI (kg/m <sup>2</sup> )         | -0.028       | -0.074          | 0.017           | 0.224    | -0.003      | -0.008          | 0.002           | 0.193    |
|       |                                  |              |                 |                 |          |             |                 |                 |          |

DM, diabetes mellitus; TSH, thyrotropin; fT4, free thyroxine; BMI, body mass index.
